# Supplementary material for: Serum Exosomal MicroRNAs Predict Acute Respiratory Distress Syndrome Events in Patients with Severe Community-Acquired Pneumonia
Source: Hindawi journal article supplement (doi:10.1155/2019/3612020), 2019-08-05
Supplement: f1 [file 3612020.f1.xlsx]

## Sheet: Sheet1
ARDS or not	miR-126	miR-27	miR-181	miR-16	miR-223	miR-146	miR-15	miR-26	miR-155	miR-21	death or not	APACH II	CRP	PCT	氧合	PSI	ang2	IL-10	IL-6	vwf	SOFA	MV%	PEEP	PLT	hospital day
0	8.69	0.02	16	0.02	0.03	1.22	4.03	66.58	1.39	1.04	0	15	130	2.6	93.33	127	2.03	19.17	7.79	325.41	7	0	0	229	18
0	5.82	0.06	64	0.03	0.42	1.71	4.52	1	1.06	97.68	0	4	101.2	0.06	280.95	63	1.86	20.18	6.65	293.56	4	0	4	283	16
0	2	0.13	256	0.4	0.02	1.22	2048	1	1.04	2.41	1	6	33.5	0.07	266.67	83	1.71	19.17	5.67	169.49	1	0	4	498	15
0	2.25	0.25	2.64	0.01	0	5.17	34.78	7.67	4.42	51.27	0	8	178.7	0.47	300	87	2.41	21.62	19.31	223.06	2	0	0	207	10
0	5.82	0.5	8	0.07	0.01	1.16	5.11	1	1.12	1.16	0	14	39.4	2.34	310.34	98	3.18	10.88	8.73	187.87	2	0	0	272	8
0	37.01	0.04	256	0.01	1	5.06	1.14	1.67	1.19	1.67	1	3	22.2	0.07	309.52	58	14.89	11.65	10.41	208.26	0	0	5	86	9
0	2.5	11.31	35.9	0	0.99	1.05	4.5	1.28	1.08	1.01	0	15	18.7	0.21	276.67	127	2.1	6.73	14.67	187.87	0	1	10	206	10
0	14.32	32	4.17	0.01	0.98	1.16	2.33	1.38	1.14	1.03	1	4	130	2.6	347.62	63	9.21	82.49	6.65	271.74	4	0	0	463	45
0	3.03	2.38	6.15	0	0.74	1.04	2.06	5.03	1.05	1	0	6	101.2	0.06	215.15	83	13.43	12.48	7.2	215.53	6	1	10	36	29
0	1.41	11.63	588.13	0.01	0.09	1.52	10.56	22.94	1.13	1.1	0	8	33.5	0.07	201.5	87	3.77	12.06	11.54	152.9	10	1	6	125	31
0	40.22	4.29	8	0.01	0.26	1.52	2.64	34.54	1.22	1.04	1	14	178.7	0.47	417.24	98	4.18	15.07	10.06	386.34	4	0	0	279	14
0	88.65	17.15	2.83	0.01	0.01	6.06	8	2.5	1.24	1.41	1	3	39.4	2.34	277	58	2.59	8.27	7.79	526.21	4	0	0	175	15
0	2.25	0.01	16	0.01	0.01	1.16	19.7	4	1.23	1.02	0	15	22.2	0.07	309.52	100	2.77	11.65	7.2	163.77	3	1	5	270	18
0	95.01	0	8	0.26	0.71	1.05	16	2.07	1.22	1.16	0	13	44.7	0.21	128.33	103	2.41	10.16	11.54	348.53	8	1	10	70	15
0	133.44	0.22	128	0.02	0.93	1.39	64	2.03	1.14	1.32	1	3	23.3	0.23	300	109	3.18	15.33	18.98	399.84	3	1	8	183	8
0	2.93	14.93	209.38	0.57	0.02	1.4	2.07	3.29	1.96	1.01	0	7	86.1	1.26	295.24	79	2.1	10.51	45.53	133.28	7	1	9	225	17
0	74.03	0.03	64	0	0.24	1.05	5.28	33.36	1.3	1.01	0	10	69.8	0.05	142.86	89	2.59	10.16	9.06	238.91	15	0	0	18	18
0	1.97	306.55	1	0.02	0.01	1.03	36	1.99	1.48	1.6	0	6	60.5	0.09	242	120	4.18	6.06	8.73	187.87	10	1	5	74	19
0	128.45	7.67	7.67	0.67	0.2	1.1	2.07	0.03	1.27	1.74	1	18	110.5	0.36	242.86	100	9.53	12.27	22.92	373.31	5	1	12	286	14
0	2	0.22	2048	0	0.97	1.04	1.13	2.25	1.17	4.06	0	7	8	0.2	236.36	70	10.93	15.33	10.41	203.81	2	0	0	169	10
0	63.56	4.52	2134.97	0.01	0.46	1.28	3.29	5.03	1.04	1.02	0	11	37.9	0.22	281.82	89	4.63	15.33	6.65	373.31	5	0	4	202	12
0	1.1	5.11	891.44	0	0.05	1.15	2.23	4.17	1.09	1.08	1	24	201	16.61	65.88	97	5.69	172.57	6.13	187.87	2	1	6	108	30
0	26.91	34.78	32	0.03	0	1.16	2.19	4.69	1.02	1.19	0	43	83.3	1.27	117.14	90	7.75	9.48	11.54	194.44	2	1	12	206	24
0	1.09	9.38	2048	0	0	7.68	2.1	9.78	1.03	1.35	1	8	156.6	12.68	121.13	105	3.4	12.06	52.23	172.42	2	1	15	197	7
0	4.59	4.29	11.63	0.92	0	1.06	2.23	3.78	1.99	1.05	0	15	142.7	0.21	224.24	140	4.96	18.21	20.68	379.77	3	0	4	165	15
0	1.32	3.71	1024	0.97	0.05	1.06	9	2.01	1.96	1.16	1	20	102	0.03	162.86	102	6.2	155.68	10.06	264.83	2	1	8	283	15
0	1.99	2.3	156.5	0.91	0	1.15	5.24	1	1.99	1.17	0	26	11.4	0.03	101.47	130	7.37	18.21	8.1	283.65	7	0	0	113	9
0	3.78	19.7	19.7	0.03	0	1.04	2.23	0.03	1.96	1.92	0	20	2.1	0.12	100	110	3.52	12.92	16.26	264.83	3	0	0	138	14
0	65.34	6.5	487.75	0.01	0	1.2	4.14	36	1.82	1.01	0	26	15.2	0.04	200	99	4.96	11.26	12.36	413.8	6	0	4	173	11
1	398.04	2134.97	34.3	0	2.17	2134.97	2.38	32.77	64.13	2.41	1	23	68.8	0.14	93.33	70	5.88	28.45	69.92	526.21	7	1	8	151	17
1	2	0.03	1	0.04	1.72	0.03	128.45	10.24	14.22	1.02	0	16	0.88	0.05	151	109	1.59	19.17	15.18	175.41	5	1	10	86	18
1	22.94	156.5	64	0.04	1.13	156.5	27.86	5.21	85.37	1.09	0	18	44.7	0.26	130	69	1.44	14.82	13.24	303.81	2	1	5	204	26
1	88.86	333.14	256	0.06	1.07	333.14	64	16.34	1.2	1.03	1	5	123.9	1.12	270	75	3.06	18.21	64.17	450.89	1	0	4	184	22
1	153.28	0.02	2.46	0.43	1.04	0.02	43.53	2.28	14.33	1.01	0	11	86.1	0.49	300	60	1.89	4.44	15.71	458.69	4	1	12	63	19
1	2352.53	0	1	0.62	5.06	0	33.82	2.06	1.18	1.22	1	1	163.7	0.08	32	130	0.86	7.46	7.79	624.76	6	0	0	226	16
1	69.07	0.01	415.87	0.52	1.16	0.01	8	2.07	1.11	1.25	0	15	192.1	0.08	115	70	2.71	7.46	4.86	563.61	2	1	11	99	43
1	66.72	0.01	128	0.99	6.06	0.01	1.23	2.23	1.14	1.07	0	20	214.8	0.2	76.25	60	1.02	9.16	6.65	458.69	4	0	5	100	25
1	286.03	0.01	5.06	0.99	1.05	0.01	1.19	5.24	4.23	1.28	0	26	7.8	0.08	54	130	0.65	10.16	7.2	614.12	5	0	0	73	10
1	2.3	0.27	31.41	0.99	1.39	0.27	1.08	16	1.13	1.28	0	23	114.7	0.08	44.68	116	1.51	9.16	7.49	298.64	6	1	8	69	35
1	24.25	4.92	6.06	0.5	1.17	4.92	3.27	2.2	1.32	1.01	0	20	23.3	0.2	36	121	1.83	6.73	47.12	386.34	3	1	6	75	31
1	286.03	2	4.11	0.13	2.39	2	2.33	22.63	1.19	1.01	1	11	214.8	0.49	280.95	107	14.64	6.06	78	458.69	2	0	0	200	12
1	64	2048	2	0.01	2.41	2048	2.87	4.69	1.04	1.21	1	24	75.2	7.53	266.67	115	3.52	9.48	16.26	491.29	6	0	0	175	27
1	17.15	891.44	2.38	0	6.41	891.44	2.87	4.56	1.1	1.29	1	43	51.7	0.05	309.52	130	4.96	8.86	83.01	303.81	9	1	12	189	13
1	357.05	111.43	4.03	0.03	1.16	111.43	66.72	4.29	1.05	1.25	1	8	201	16.61	310.34	70	1.68	8.56	62	603.67	13	1	15	228	28
1	250.73	487.75	4.52	0	1.02	487.75	33.36	7.31	39.49	1.49	0	15	83.3	1.27	142	60	4.39	10.16	107.39	563.61	15	1	5	265	14
1	256	58.08	5.11	0.01	1.02	58.08	2.07	7.31	3.41	1.4	1	20	156.6	12.68	257.58	130	3.2	10.88	72.36	428.26	12	1	11	241	17
1	1024	209.38	34.78	0	1.09	209.38	10.48	0.08	69.09	1.08	1	26	142.7	0.21	71	130	5.5	10.16	78.85	583.3	7	0	0	248	13
1	1.77	1024	58.08	0	2.17	1024	2.06	2.23	1.89	1.03	0	23	102	0.03	37.5	120	25.85	8.56	102	314.42	6	1	10	340	9
1	2.81	445.72	306.55	0	1.06	445.72	2.62	2.23	1.88	1.01	1	10	11.4	0.03	142.86	106	17.69	6.39	240.65	360.71	3	1	8	310	15
1	5.28	64	9.38	0.01	1.06	64	33.36	3.03	1.01	1.32	0	3	2.1	0.12	224.24	89	24.13	8.86	95.23	386.34	5	1	9	230	20
1	2702.35	73.52	111.43	0.01	1.15	73.52	66.72	3.34	1.04	5.06	1	10	15.2	0.04	322.86	140	13.76	10.51	41.78	563.61	6	0	5	190	18
1	1031.12	222.86	333.14	0	1.4	222.86	36	20.48	2.83	2.39	0	7	68.8	0.14	300	75	21.04	10.51	244.82	458.69	4	1	15	200	21
1	50.91	4.03	5.21	0.36	1.06	4.03	2.23	9.65	1.02	1.01	1	8	0.88	0.05	118.57	65	18.34	11.65	7.2	413.8	3	1	10	210	15
